# Supplementary material
Source: PubMed Central journal article supplement (PMC2838281)
Supplement: supp_M109.089003_Table_S2b.pdf [file supp_M109.089003_Table_S2b.pdf]

**Table S2 (B) : Peptide coverage of RFP, ubiquitin and E2S sequences, as determined by mass spectrometry**

| Peptides corresponding to RFP sequence | Peptides corresponding to ubiquitin sequence | Peptides corresponding to UBE2S sequence                   |
|----------------------------------------|----------------------------------------------|------------------------------------------------------------|
| R.MYPEDGALKGEIK.M                      | R.LIFAGKQLEDGR.T                             | R.ALASGTEASSTDPGAPGGPGGAEGPMAK.K                           |
| Y.FQGHMQIFVK.T                         | K.IQDKEGIPPDQQR.L                            | K.EVTTLTADPPDGIK.V                                         |
| R.HSTGAENLYFQGHMQI.F                   | K.ESTLHLVLR.L                                | <b>R.ALASGTEASSTDPGAPGGPGGAEGPMAK*K.H (K197)</b>           |
| Y.FQGHMQIFVK.T                         | K.TITLEVEPSDTIENVK.A                         | K.GYFLTK.I                                                 |
| R.HSTGAENLYFQGHMQIF.V                  | R.LIFAGK.Q                                   | R.LLTEIHGGAGGPPSGR.A                                       |
| Y.VKHPADIPDYKL.S                       | R.TLSDYNIQK.E                                | K.RDWTAEELGIR.H                                            |
| Y.VKHPADIPDYK.L                        | <b>K.TLTGK*TITLEVEPSDTIENVK.A (K11)</b>      | R.HVLLTIK.C                                                |
| K.LRGTFNPSDGPVMQK.K                    | L.EVEPSDTIENVK.A                             | K.CLLIHPNPESALNEEAGR.L                                     |
| K.HPADIPDYK.L                          | L.SDYNIQK.E                                  | R.DWTAELGIR.H                                              |
| K.KPVQLPGAYK.K                         | <b>K.TLTGK*TITL.E (K11)</b>                  | R.LLLENYEEYAAR.A                                           |
| L.KLSFPEGFK.W                          | K.TLTGKTITLEVEPSDTIENVK.A                    | R.ALASGTEASSTD.P                                           |
| L.KLSFPEGFK.K                          |                                              | N.YEEYAAR.A                                                |
| Y.FQGHMQIF.V                           |                                              | E.SALNEEAGR.L                                              |
| R.GTNFPSD.G                            |                                              | N.PESALNEEAGR.L                                            |
| K.DGGHYDAEVK.T                         |                                              | K.DFPASPPK.G                                               |
| R.GTNFPSDGPVMQK.K                      |                                              | D.PGAPGGPGGAEGPMAK.K                                       |
| K.TMGWEASTER.M                         |                                              | <b>D.PGAPGGPGGAEGPMAK*K.H (K197)</b>                       |
| N.EDYTIVEQYER.A                        |                                              | K.IFHPNVGAN.G                                              |
| D.SSLQDGEFIYK.V                        |                                              | R.LLLENY.E                                                 |
| K.LKDGGHYDAEVK.T                       |                                              | L.TEIHGGAGGPPSGR.A                                         |
| R.HSTGAENLYFQGH.M                      |                                              | L.LTEIHGGAGGPPSGR.A                                        |
| K.KPVQLPGAYK.T                         |                                              | <b>R.ALASGTEASSTDPGAPGGPGGAEGPMAK*K*HAGER.D (K197,198)</b> |
| R.MEGSVNGHEFEIEGEGEGR.P                |                                              | <b>D.PGAPGGPGGAEGPMAK*.H (K198)</b>                        |
| K.LDITSHNEDYTIVEQYER.A                 |                                              | <b>R.ALASGTEASSTDPGAPGGPGGAEGPMAK*.H (K198)</b>            |
| R.MEGSVNGHEFEIEGEGEGRPYEGTQTAK.L       |                                              | I.F]HPNVGANGEICVNVLK.R                                     |
| R.MYPEDGALKGEIK.M                      |                                              | K.IFHPNVGANGEICVNVLK.R                                     |
| D.GGHYDAEVK.T                          |                                              | A.PGGPGGAEGPMAK.K                                          |
| R.MYPEDGALK.G                          |                                              | H.PNPESALNEEAGR.L                                          |
| P.ADIPDYK.L                            |                                              | N.GEICVNVLK.R                                              |
| D.GALKGEIK.M                           |                                              | L.LLLENYEEYAAR.A                                           |
| D.GGHYDAEVKTTYMAKKPVQLPGAYKTD.I        |                                              | I.HGGAGGPPSGR.A                                            |
| K.LRGTFNPSDGPVMQK.K                    |                                              | K.IFHPNVGANGEI.C                                           |
| K.LSFPEGFKWER.V                        |                                              | N.SNVENLPPHIIR.L                                           |
|                                        |                                              | <b>LLL GK*DFPASPPK (K68)</b>                               |
