# Supplementary material
Source: PubMed Central journal article supplement (PMC2838281)

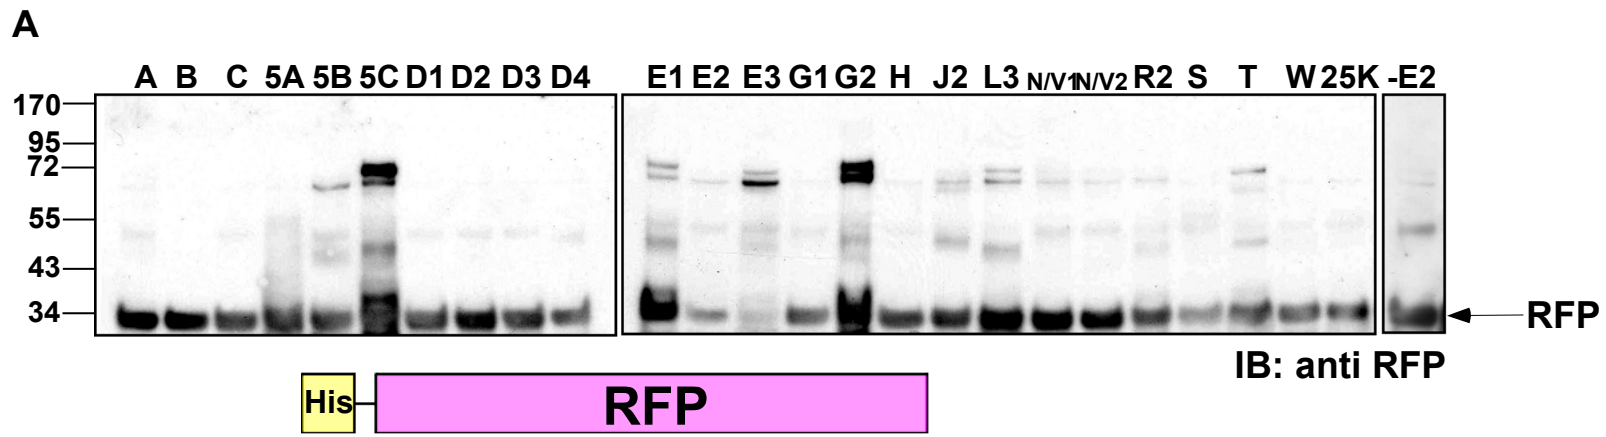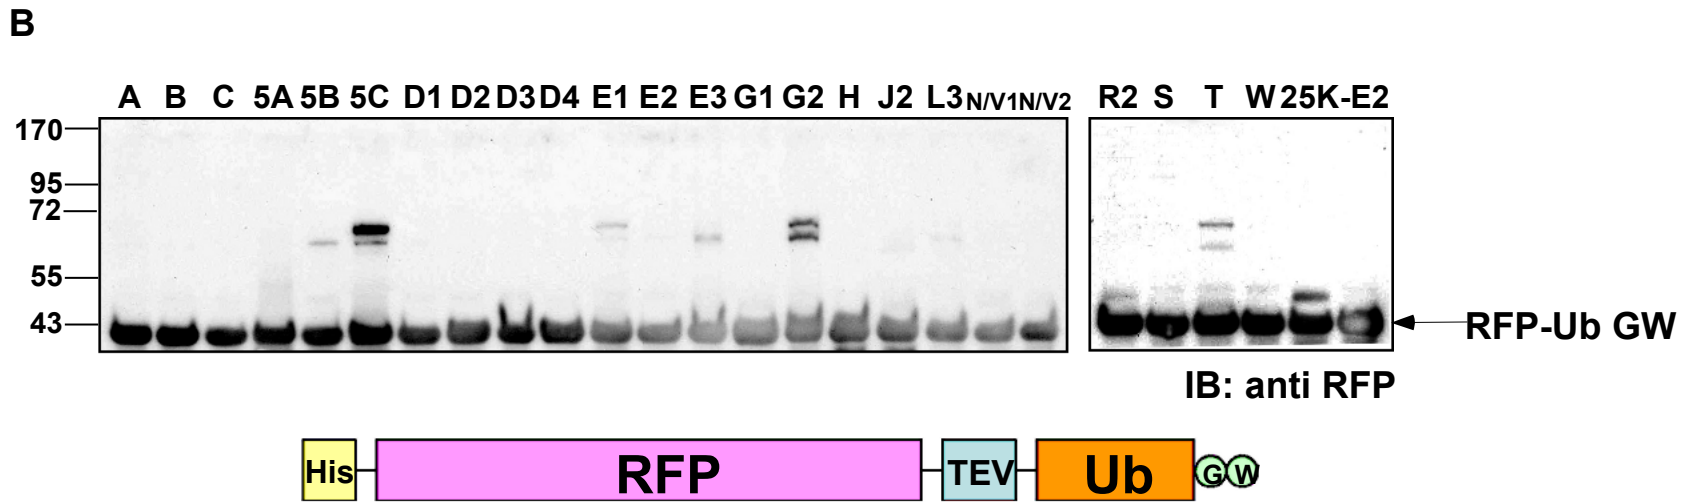

Supplement: supp_M109.089003_Fig_S11.pdf [file supp_M109.089003_Fig_S11.pdf]

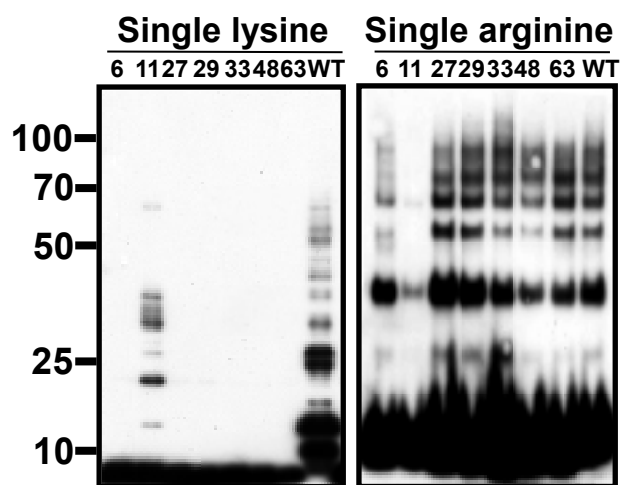

**Ubc5A**

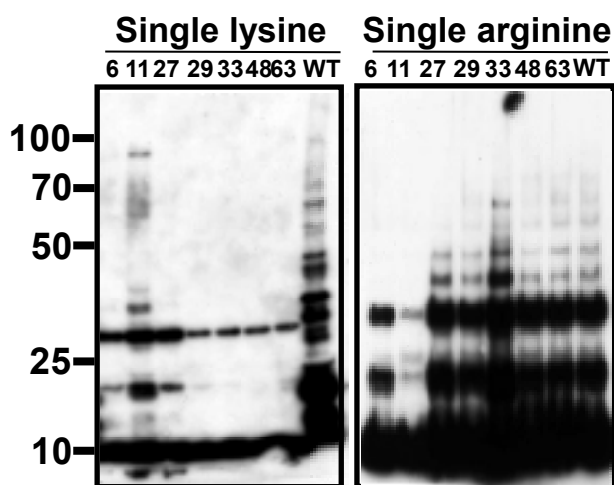

**UBE2D4**

IB: anti ubiquitin

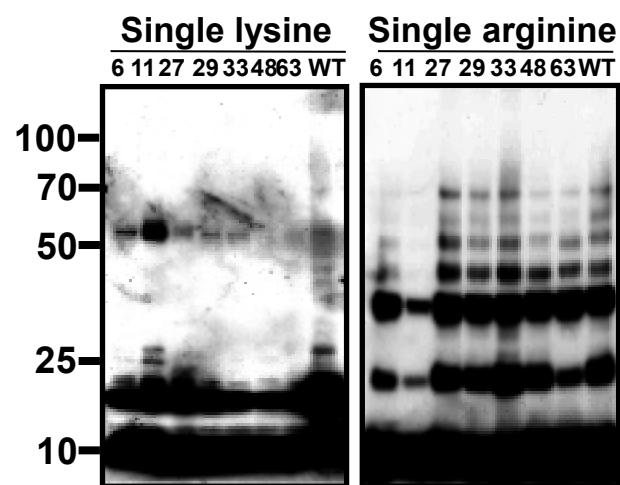

**UBE2A**

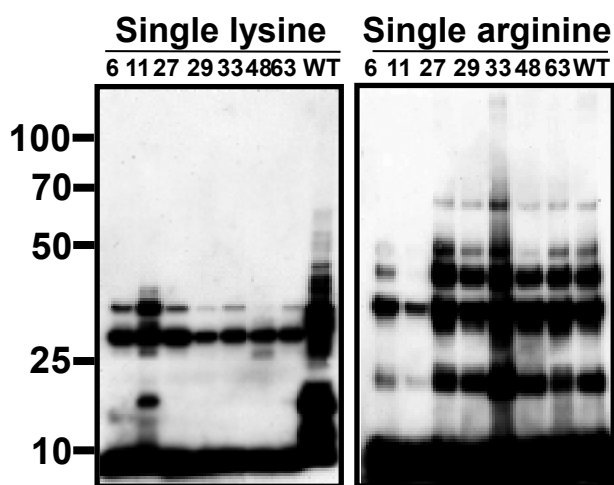

**UBE2B**

IB: anti ubiquitin

Supplement: supp_M109.089003_Fig_S5.pdf [file supp_M109.089003_Fig_S5.pdf]
